# Supplementary material
Source: Springer Nature journal article supplement (https://www.springermedizin.de/resource/supplementary/13098_2013_229_MOESM2_ESM.pdf/9670786)
Supplement: MOESM2 [file 9670786]

MEDLINE, SCOPUS, CINAHL, Web of Science and The Cochrane Library, Historical search

Total of 212 clinical trials screened

188 trials excluded: Not randomized controlled trials

23 RCTs retrieved

4 randomized trials  
(31-34)

Excluded (n=19): Pregnancy, Mixed age group, Mixed population (T1DM and T2DM) .Did not test the benefit of CGM. Follow-up report
